# Supplementary material for: High-Performance and Low-Cost Membranes Based on Poly(vinylpyrrolidone) and Cardo-Poly(etherketone) Blends for Vanadium Redox Flow Battery Applications
Source: MDPI journal article supplement (doi:10.3390/batteries8110230), 2022-11-10
Supplement: s1 [file s1]

# High-Performance and Low-Cost Membranes Based on Poly(vinylpyrrolidone) and Cardo-Poly(etherketone) Blends for Vanadium Redox Flow Battery Applications

Tong Mu, Shifan Leng, Weiqin Tang, Ning Shi, Guorui Wang and Jingshuai Yang \*

Department of Chemistry, College of Sciences, Northeastern University, Shenyang 110819, China

\* Correspondence: yjs@mail.neu.edu.cn

## FT-IR and SEM

The Fourier transform infrared (FT-IR) spectra were collected on the Bruker VERTEX70 spectrometer. An SU-8010 scanning electron microscope (SEM) was used to detect the surface of membranes.

## Acid uptake and Swellings

The acid absorption of one membrane was performed by submersing the dried membrane ( $m_{dry}$ ) in the 3 M SA solution at RT for 48 h. The SA doped membrane was wiped with filter paper and weighed ( $m_{wet}$ ), and subsequently dried in an oven at 80 °C to remove moisture and quickly weighed again ( $m_{doped}$ ). The water uptake (WU%) and acid doping content (ADC%) of each  $x\%$ PVP-PEKC membrane is calculated by Equation S1 and Equation S2. Meanwhile, the acid doping level (ADL) of the membrane is defined as the number of SA molecules per PVP repeat unit and calculated based on Equation S3 [1,2,3]. The dimension changes of one membrane in terms of area and volume swellings were measured according to the previous reports elsewhere [4,5].

$$WU\% = \frac{(m_{wet} - m_{doped})}{m_{dry}} \times 100\% \quad (S1)$$

$$ADC\% = \frac{(m_{doped} - m_{dry})}{m_{dry}} \times 100\% \quad (S2)$$

$$ADL = \frac{(m_{wet} - m_{doped}) \times M_{PVP}}{m_{dry} \times x_{PVP} \% \times 98} \quad (S3)$$

### **Mechanical properties**

On a tensile strength instrument (CMT2000, SHIJIN Company, China), the tensile stress-stain curves of membranes with acid were recorded at a constant crosshead speed of 5 mm min<sup>-1</sup>.

### **Area resistance and vanadium ion permeability**

The ARs of membranes were determined by an electronic impedance spectroscopy (EIS) ranging from 100 MHz to 1 Hz as reported in literature [1,6]. The acid absorbed membranes with an effective area of 2.27 cm<sup>2</sup> were fixed between two diffusion cells containing a 3.0 M H<sub>2</sub>SO<sub>4</sub> solution. The area resistance (Ω·cm<sup>2</sup>) was calculated with the Equation S4.

$$AR = (R_2 - R_1) \times A \quad (S4)$$

Where  $R_1$  and  $R_2$  are the resistance of the cell without and with membrane, respectively;  $A$  is the effective area.

The permeability of VO<sup>2+</sup> was measured in a diffusion cell as described elsewhere [1,2]. The 80 mL of 1.5 M VOSO<sub>4</sub> and 3.0 M H<sub>2</sub>SO<sub>4</sub> solution was filled in the left compartment, while the same volume of 1.5 M MgSO<sub>4</sub> and 3.0 M H<sub>2</sub>SO<sub>4</sub> solution was filled into the right one. The diffusion cell was placed on a magnetic stirrer and stirred vigorously to reduce concentration polarization. After a certain interval, the VO<sup>2+</sup> ion concentration of the right cell was measured on an UV-vis spectrometer (Perkin Elmer Lambda 35 UV-Vis) using MgSO<sub>4</sub> as the reference within the scanning range of 550-800nm. The VO<sup>2+</sup> permeability is calculated by the following Equation S5.

$$V_b \frac{d(C_b(t))}{dt} = A \frac{P}{L} (C_a - C_b(t)) \quad (S5)$$

Where  $V_b$  is the solution volume in the right cell.  $C_a$  is the initial  $\text{VO}^{2+}$  concentration in the left cell and  $C_b(t)$  is the  $\text{VO}^{2+}$  concentration in the right compartment.  $A$  and  $L$  are the effective area and thickness of the membrane.  $P$  represents the vanadium ions permeability of one membrane.

The chemical stability of  $x\%$ PVP-PEKC membranes was investigated by submersing the dry samples in the 1.5 M  $\text{VO}_2^+$  and 3 M SA solution as described elsewhere [7,8]. The dry sample was weighted and then immersed in 10 mL solution at RT. During the test, the sample was taken out of the solution every 24 h, followed by rinsed with water and dried in an oven at 80 °C for 6 h to remove the water, and then weighed it again. The chemical stability of the samples was evaluated by determining the mass change of the membrane.

### VRFB performance and cycling durability

The VRFB performance of the membrane was tested on a home-made single cell. The battery was made by sandwiching the tested membrane between two current collectors, whose effective area of electrodes was 9 cm<sup>2</sup> (3×3cm). Both positive and negative electrodes employed 25 mL of 1.65 M  $\text{V}^{3+}/\text{VO}^{2+}$  in 3.0 M  $\text{H}_2\text{SO}_4$  as the cell electrolyte [3,9]. The battery performance was determined at 80-180 mA cm<sup>-2</sup> by a battery test system (Neware CT-3008 (5 V/6 A)). The cut-off voltage window was set between 1.00 to 1.65 V. The current density of the long-term cycle test was evaluated at 100 mA cm<sup>2</sup>. In addition, no stabilizer was added to the electrolyte during the test. According to Equations S6-S8, the coulombic efficiency (CE), energy efficiency (EE) and voltage efficiency (VE) are calculated, where  $I$  is the current,  $V$  is the voltage and  $t$  is the time, and the subscripts  $d$  and  $c$  mean the discharge and charge process, respectively.

$$CE\% = \frac{\int I_d dt}{\int I_c dt} \times 100\% \quad (\text{S6})$$

$$EE\% = \frac{\int V_d I_d dt}{\int V_c I_c dt} \times 100\% \quad (\text{S7})$$

$$VE\% = \frac{EE}{CE} \times 100\% \quad (\text{S8})$$

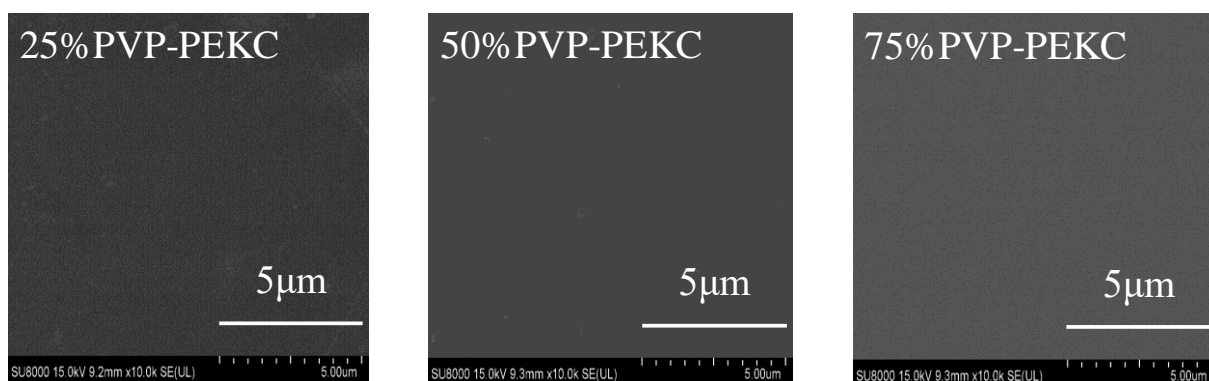

**Figure S1.** Surface SEM images of 25%PVP-PEKC, 50%PVP-PEKC and 75%PVP-PEKC.

**Table S1.** Comparison of the battery performance of various membranes in this work and literature at the current density of 80 mA cm<sup>-2</sup>.

| Membrane                         | Thickness / $\mu\text{m}$ | CE / % | VE / % | EE / % | Reference |
|----------------------------------|---------------------------|--------|--------|--------|-----------|
| 50%PVP-PEKC                      | 35                        | 99.2   | 84.1   | 83.8   | This work |
| BI <sub>p</sub> PBI <sup>a</sup> | 27                        | ~100   | ~82    | ~82    | [1]       |
| PBI-40%SiO <sub>2</sub>          | 63                        | 100    | ~88    | ~88    | [2]       |
| SPEEK/PVP 30%                    | 145                       | ~99    | ~84    | ~83    | [10]      |
| CPVC <sup>b</sup> /PVP-M14       | --                        | 99.2   | 90.0   | 89.3   | [11]      |
| PSF <sup>c</sup> /PVP-50         | 35                        | ~98    | ~91    | ~90    | [12]      |
| PES <sup>d</sup> /PVP-M3         | 115                       | 92.4   | 82.4   | 76.1   | [13]      |
| SP3 <sup>e</sup>                 | 110                       | ~96    | ~88    | ~84    | [14]      |
| PBI                              | 30                        | ~99    | ~65    | ~66    | [15]      |
| PF-21 <sup>f</sup>               | 25                        | 98.9   | 84.8   | 83.9   | [16]      |
| PBI-EDB <sup>g</sup> -30-20      | 19                        | 99     | 92.2   | 91.3   | [17]      |
| SIPNs-60 <sup>h</sup>            | 50                        | ~99    | ~83    | ~84    | [18]      |

|                           |     |     |     |     |      |
|---------------------------|-----|-----|-----|-----|------|
| PTP-CHPTMA <sup>i</sup>   | 50  | ~99 | ~89 | ~88 | [19] |
| PAEK-API 2.0 <sup>j</sup> | 133 | ~97 | ~84 | ~82 | [20] |
| Q2-ADMPEK-4 <sup>k</sup>  | 40  | ~99 | 88  | ~88 | [21] |

a: poly[2,20-(2-benzimidazole-p-phenylene)-5,50-bibenzimidazole];

b: chlorinated polyvinyl chloride;

c: polysulfone;

d: poly (ether sulfone);

e: poly(ether ether ketone) (SPEEK) membranes with DS of 0.91;

f: blending meta-PBI with FAA3i, while '2' being the weight based ratio of PBI to FAA3;

g: 1,2-dibromoethane;

h: semi-interpenetrating polymer networks consisting of cross-linked polyvinylpyrrolidone (PVP) and polysulfone (PSF);

i: hydroxypropyltrimethyl ammonium grafted poly(terphenyl piperidinium) membrane;

j: poly(arylene ether ketone) with 1-(3- aminopropyl) imidazole pendant groups membrane;

k: quaternized 2-adamantane containing poly(ether ketone) membrane.

## Reference

- [1] Jang JK, Kim TH, Yoon SJ, Lee JY, Lee JC, Hong YT. Highly proton conductive, dense polybenzimidazole membranes with low permeability to vanadium and enhanced H<sub>2</sub>SO<sub>4</sub> absorption capability for use in vanadium redox flow batteries. *J. Mater. Chem. A*. 2016;4:14342-14355. doi:10.1039/C6TA05080H
- [2] Che XF, Zhao H, Ren XR, Zhang DH, Wei H, Liu JG, Zhang X, Yang JS. Porous polybenzimidazole membranes with high ion selectivity for the vanadium redox flow battery. *J. Membr. Sci.* 2020;611:118359. doi:10.1016/j.memsci.2020.118359
- [3] Ren XR, Zhao LN, Che XF, Cai YY, Li YQ, Li HH, Chen H, He HX, Liu J, Yang J. Quaternary

- ammonium groups grafted polybenzimidazole membranes for vanadium redox flow battery applications. *J. Power Sources*. 2020;457:228037. doi:10.1016/j.jpowsour.2020.228037
- [ 4 ] Teng XG, Dai JC, Su J, Zhu YM, Liu HP, Song ZJ. A high performance polytetrafluoroethene/Nafion composite membrane for vanadium redox flow battery application. *J. Power Sources*. 2013;240:131-139. doi: 10.1016/j.jpowsour.2013.03.177
- [5] Jiang B, Wu LT, Yu LH, Qiu XP, Xi JY. A comparative study of Nafion series membranes for vanadium redox flow batteries. *J. Membr. Sci.* 2016;510:18-26. doi:10.1016/j.memsci.2016.03.007
- [6] Hu L, Gao L, Zhang CK, Yan XM, Jiang XB, Zheng WJ, Ruan XH, Wu XM, Yu GH, He GH. “Fishnet-like” ion-selective nanochannels in advanced membranes for flow batteries. *J. Mater. Chem. A*. 2019;7:21112-21119. doi:10.1039/C9TA06742F
- [7] Dai XJ, Yu LH, Li ZH, Yan J, Liu L, Xi JY, Qiu XP. Sulfonated Poly(Ether Ether Ketone)/Graphene composite membrane for vanadium redox flow battery. *Electrochim. Acta* 2014;132:200-207. doi: 10.1016/j.electacta.2014.03.156
- [8] Xing Y, Geng K, Chu XM, Wang CY, Liu L, Li NW. Chemically stable anion exchange membranes based on C2-Protected imidazolium cations for vanadium flow battery. *J. Membr. Sci.* 2021;618:118696. doi: 10.1016/j.memsci.2020.118696
- [9] Tang WQ, Yang YF, Liu XL, Dong JH, Li HH, Yang JS. Long side-chain quaternary ammonium group functionalized polybenzimidazole based anion exchange membranes and their applications. *Electrochim. Acta* 2021;391:138919. doi: 10.1016/j.electacta.2021.138919
- [10] Li AF, Wang G, Wei XY, Li F, Zhang MM, Zhang J, Chen JW, Wang RL. Highly selective sulfonated poly(ether ether ketone)/ polyvinylpyrrolidone hybrid membranes for vanadium redox flow batteries. *J. Mater. Sci.* 2020;55:16822-16835. doi:10.1007/s10853-020-05228-8

- [11] Lu WJ, Shi DQ, Zhang HM, Li XF. Advanced poly(vinyl pyrrolidone) decorated chlorinated polyvinyl chloride membrane with low area resistance for vanadium flow battery. *J. Membr. Sci.* 2021;620:118947. doi: 10.1016/j.memsci.2020.118947
- [ 12 ] Wu CX, Lu SF, Wang HN, Xu X, Peng SK, Tan QL, Xiang Y. A novel polysulfone-polyvinylpyrrolidone membrane with superior proton-to-vanadium ion selectivity for vanadium redox flow batteries. *J. Mater. Chem. A.* 2016;4:1174-1179. doi:10.1039/C5TA08593D
- [13] Li Y, Zhang HM, Li XF, Zhang HZ, Wei WP. Porous poly (ether sulfone) membranes with tunable morphology: Fabrication and their application for vanadium flow battery. *J. Power Sources.* 2013;233:202-208. doi: 10.1016/j.jpowsour.2013.01.088
- [14] Yuan ZZ, Li XF, Hu JB, Xu WX, Cao JY, Zhang HM. Degradation mechanism of sulfonated poly(ether ether ketone) (SPEEK) ion exchange membranes under vanadium flow battery medium. *Phys. Chem. Chem. Phys.* 2014;16:19841-19847. doi:10.1039/C4CP03329A
- [15] Zhou XL, Zhao TS, An L, Wei L, Zhang C. The use of polybenzimidazole membranes in vanadium redox flow batteries leading to increased coulombic efficiency and cycling performance. *Electrochim. Acta.* 2015;153:492-498. doi:10.1016/j.electacta.2014.11.185
- [16] Jung M, Lee W, Noh C, Konovalova A, Yi GS, Kim S, Kwon Y, Henkensmeier D. Blending polybenzimidazole with an anion exchange polymer increases the efficiency of vanadium redox flow batteries. *J. Membr. Sci.* 2019;580:110-116. doi:10.1016/j.memsci.2019.03.014
- [17] Shi MQ, Dai Q, Li F, Li TY, Hou GJ, Zhang HM, Li XF. Membranes with well-defined selective layer regulated by controlled solvent diffusion for high power density flow battery. *Adv. Energy Mater.* 2020;10:2001382. doi:10.1002/aenm.202001382
- [ 18 ] Zeng L, Zhao TS, Wei L, Zeng YK, Zhang ZH. Polyvinylpyrrolidone-based semi-interpenetrating polymer networks as highly selective and chemically stable membranes

for all vanadium redox flow batteries. *J. Power Sources*. 2016;327:374-383.  
doi:10.1016/j.jpowsour.2016.07.081

- [19] Tang WQ, Mu T, Che XF, Dong JH, Yang JS, Highly selective anion exchange membrane based on quaternized poly(triphenyl piperidine) for the vanadium redox flow battery. *ACS Sustainable Chem. Eng.* 2021;9:14297-14306. doi: 10.1021/acssuschemeng.1c05648
- [20] Ahn Y, Kim D. Anion exchange membrane prepared from imidazolium grafted poly (arylene ether ketone) with enhanced durability for vanadium redox flow battery. *J. Ind. Eng. Chem.* 2019;71:361-368. doi:10.1016/j.jiec.2018.11.047
- [21] Zhang B, Wang Q, Guan S, Weng Z, Zhang E, Wang G, Zhang Z, Hu J, Zhang S. High performance membranes based on new 2-adamantane containing poly(aryl ether ketone) for vanadium redox flow battery applications. *J. Power Sources*. 2018;399:18-25. doi:10.1016/j.jpowsour.2018.07.050
